# Supplementary material
Source: PubMed Central journal article supplement (PMC4019153)

## Supplemental Table:

| Name of the primer | Description                                                                       | Sequence (5'-3')                                 |
|--------------------|-----------------------------------------------------------------------------------|--------------------------------------------------|
| P1                 | Forward primer to amplify full length <i>adpF</i> with an <i>NcoI</i> site        | CGT ACG ACC ATG GCT TGA AAG<br>ATA TGA AAA AAC   |
| P3                 | Reverse primer with an <i>XhoI</i> site                                           | CGT ATG CTC GAG TTG TAT CAT<br>TAT TTT CTT GC    |
| P2                 | Forward primer to amplify truncated (103 bp) <i>adpF</i> with an <i>NcoI</i> site | GAT CAT ACC ATG GCT GGT ACA<br>GCC AAA CTG AAT G |

## Supplemental Figures:

**Fig.S1.** Alignment of leucine-rich repeat (LRR) regions of AdpF along with the LRR consensus sequence from *Treponema pallidum*. Left side of the figure shows the numbers of amino acid sequence.

**Fig. S2. Role of rAdpF in interaction of *Prevotella intermedia* 17 with eukaryotic cells.** 100 $\mu$ g (final concentration 0.05 $\mu$ g/ml) of rAdpF or BSA was added to the eukaryotic cells and incubated for 2hr. Culture condition and data analysis was performed as described in Materials and Methods. Total interaction of *P.intermedia* 17 with HeLa and 3T3 cell lines exposed to recombinant rAdpF, BSA and no protein (control)(A). Invasion of *P.intermedia* 17 into HeLa and NIH3T3 cells (B). \*: P<0.05, \*\*\* : P<0.0001, NS: not significant.

Fig.S1

11-33      **I** F L **I** A **V** C A Q **L** S A **F** A S V L E K E **T** L V  
48-68            **F** N **I** T GEG **I** A E **V** **G** N G K N A A **I** S Q  
71-93      **V** G Q **L** V **I** P A S **F** T N A A E N R Q Y K **I** T K  
105-127    **L** T E **V** V **L** E E G **I** T E **I** **G** E Q T **F** F G **C** N A  
128-150    **L** L N **I** G Y P A S **L** T T **I** **G** R G **A** **F** R G **C** R N  
151-173    **L** K H T N **L** P A N **L** A T **I** **G** Q E T **F** A E **N** Q F  
178-196            **I** V **I** P N K **I** T T **I** P L A S **F** E S **S** K  
197-219    **L** Q I **V** V **L** P P S **L** T S **I** E E D **A** **F** L H **S** E G  
347-370    **L** H H **I** A **L** P T N **I** E A AQA K N **A** **F** A Q **C** K A  
94-103    **V** G D **F** A **F** S L C  
371-379    **L** V S **L** D **L** S K L  
639-647    **L** Q G **I** K **L** N G K

---

TpLRR      **L** X X **L** X **L** X X X **L** X X **I** **g** X X **A** **F** X X **N** X X

**Fig. S2**

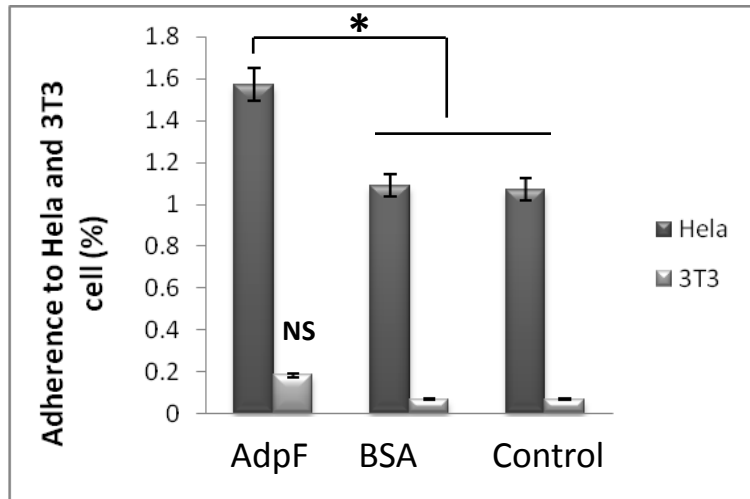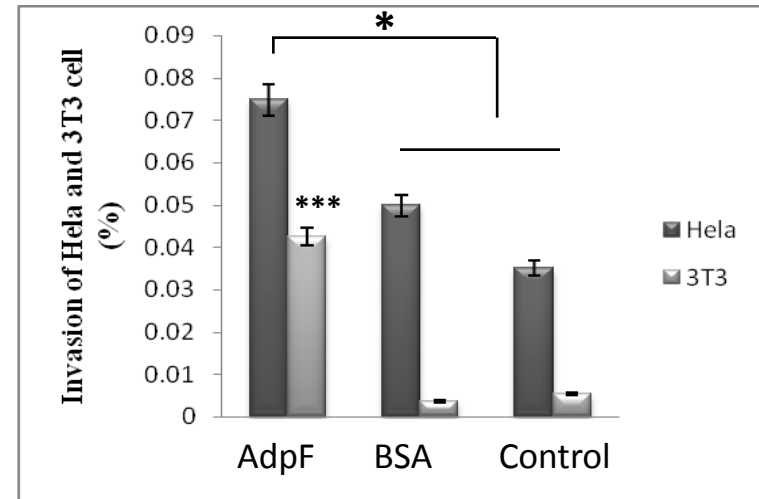

Supplement: IAI.01361-13_zii999090722so1.pdf [file IAI.01361-13_zii999090722so1.pdf]
